# Supplementary material for: Phosphorus-doped carbon nitride with grafted sulfonic acid groups for efficient photocatalytic synthesis of xylonic acid
Source: Royal Society of Chemistry journal article supplement (doi:10.1039/d1gc00920f), 2021-01-01
Supplement: d1gc00920f1.pdf [file d1gc00920f1.pdf]

## Supporting Information for

### Phosphorus-doped carbon nitride with grafted sulfonic acid groups for efficient photocatalytic synthesis of xylonic acid

**Jiliang Ma, <sup>\*,a,b,c</sup> Dongnv Jin, <sup>#a</sup> Xiaopan Yang, <sup>a</sup> Shaolong Sun, <sup>\*d</sup> Jinghui Zhou,  
<sup>a</sup> Runcang Sun <sup>\*a</sup>**

<sup>a</sup> Liaoning Key Laboratory of Lignocellulose Chemistry and BioMaterials, College of Light Industry and Chemical Engineering, Dalian Polytechnic University, Dalian, China, 116034

<sup>b</sup> State Key Laboratory of Biobased Material and Green Papermaking, Qilu University of Technology, Shandong Academy of Sciences, Jinan, 250353

<sup>c</sup> National Forestry and Grassland Administration Key Laboratory of Plant Fiber Functional Materials, Fuzhou, Fujian, China, 350108

<sup>d</sup> College of Natural Resources and Environment, South China Agricultural University, Guangzhou, Guangdong, 510642

\*Corresponding authors' E-mail: [jlma@dlpu.edu.cn](mailto:jlma@dlpu.edu.cn) (Jiliang Ma), [sunshaolong328@scau.edu.cn](mailto:sunshaolong328@scau.edu.cn) (Shaolong Sun) and [rcsun3@dlpu.edu.cn](mailto:rcsun3@dlpu.edu.cn) (Runcang Sun) Tel.: +86-0411-86323652; Fax: +86-0411-86323652

## Experimental Section

*Materials:* Melamine, phosphoric acid (PA), potassium hydroxide (KOH), xylose, trifluoromethanesulfonic acid and dichloromethane of reagent grade were purchased from Macklin Industrial Corporation (Shanghai, China). Potassium iodide (KI), isopropanol (IPA), benzoquinone (BQ), tryptophan (Trp) and other reagents were provided by Aladdin Industrial Corporation. Except for the standard samples, the other chemicals were analytically pure and used directly without further purification.

## Results and Discussion

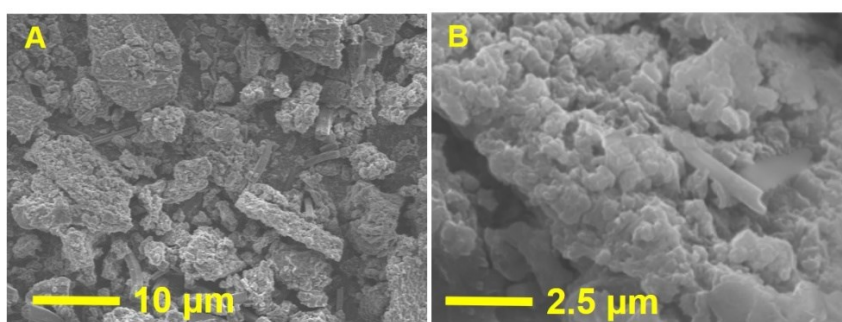

**Fig. S1.** SEM images of P@CN-SO<sub>3</sub>H.

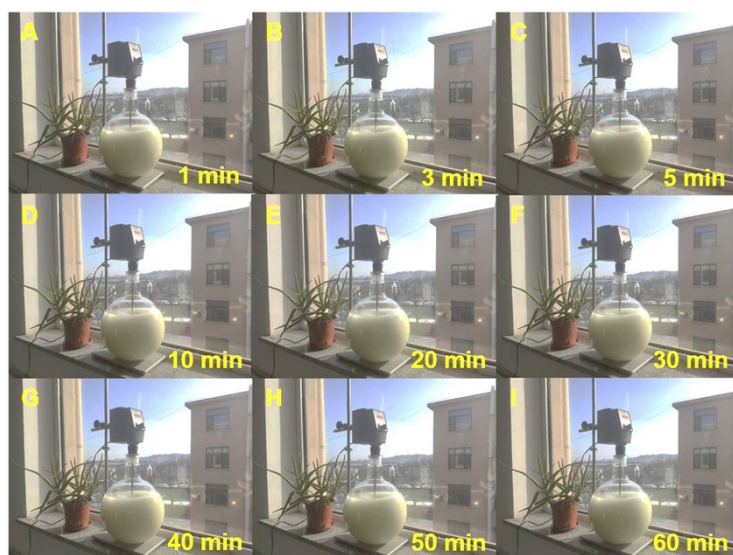

**Fig. S2.** One-thousand-fold scale-up experiment for the synthesis of xylonic acid photocatalyzed by P@CN-SO<sub>3</sub>H in the irradiation of sunlight at room temperature (~20 °C).

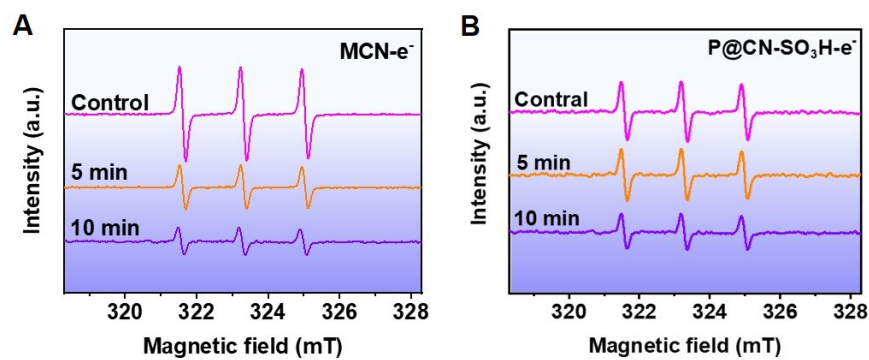

**Fig. S3.** TEMPO ESR spin-labeling for e<sup>-</sup> of MCN (A) and P@CN-SO<sub>3</sub>H (B).

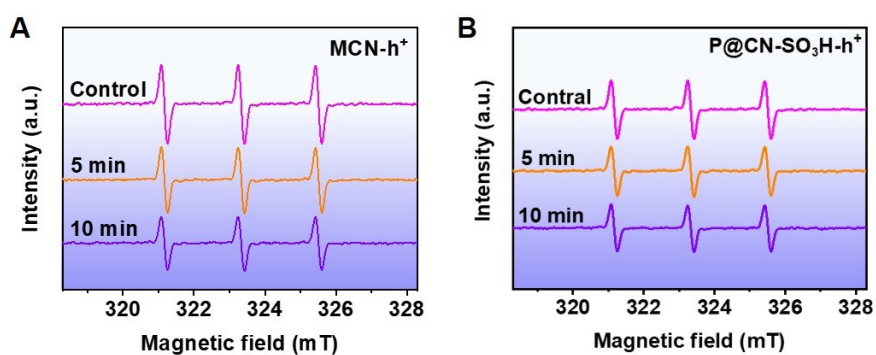

**Fig. S4.** TEMPO ESR spin-labeling for h<sup>+</sup> of MCN (A) and P@CN-SO<sub>3</sub>H (B).

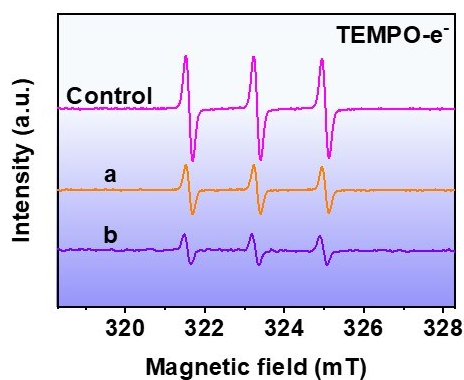

**Fig. S5.** TEMPO ESR spin-labeling for e<sup>-</sup> of MCN (a) and P@CN-SO<sub>3</sub>H (b) under the same conditions.

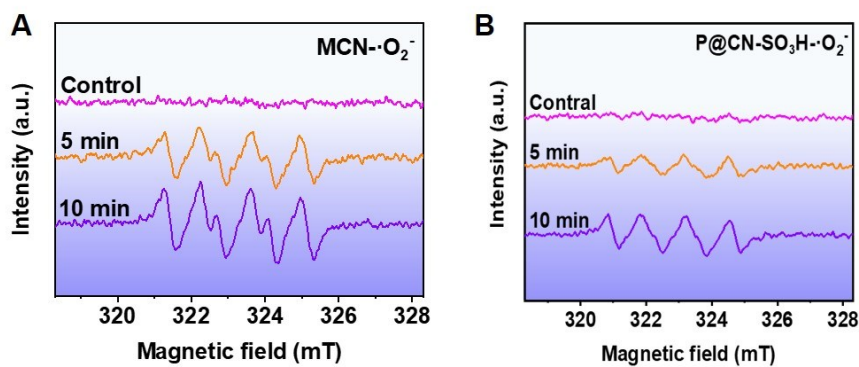

Fig. S6. DMPO ESR spin-trapping for  $\cdot\text{O}_2^-$  of MCN (A) and P@CN-SO<sub>3</sub>H (B).

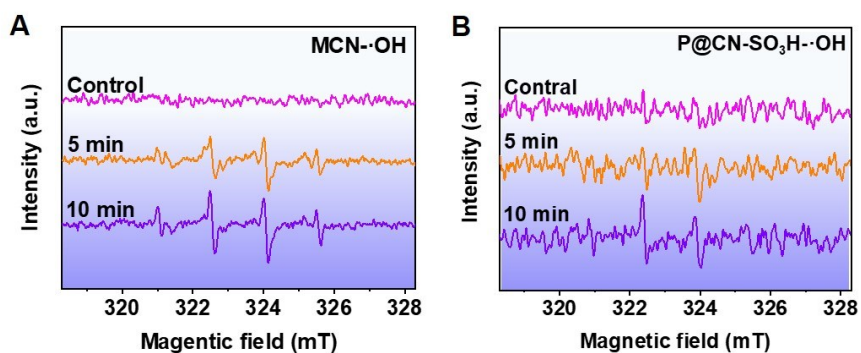

Fig. S7. DMPO ESR spin-trapping for  $\cdot\text{OH}$  of MCN (A) and P@CN-SO<sub>3</sub>H (B).

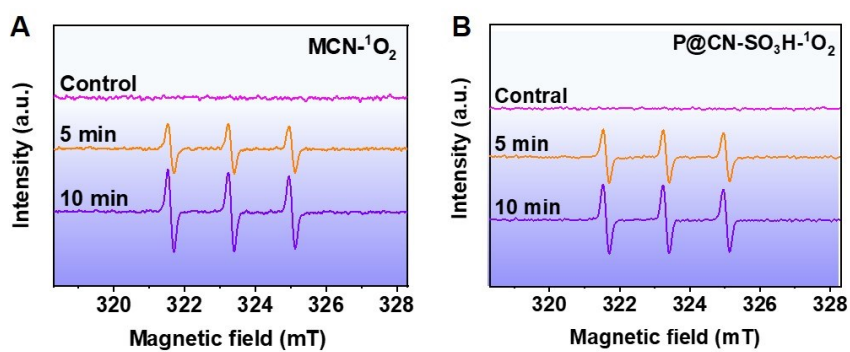

Fig. S8. TEMPONE ESR spin-trapping for  $^1\text{O}_2$  of MCN (A) and P@CN-SO<sub>3</sub>H (B).
